# Supplementary material
Source: Research Square preprint supplement (doi:10.21203/rs.3.rs-9453070/v1)
Supplement: Supplementary file 1 [file b0824338577d61d5160c1742.doc]

**ATG Cz**

How much afraid would you be in the following situations **(1 – barely afraid at all, 7- very much afraid)**:

|  | **1-7** |
| --- | --- |
| 1. While walking along a street, I see a person with a firearm pointed to the ground  in his hand. |  |
| 2. While in bank, I am an eye-whiteness of a bank robbery. |  |
| 3. On the subway train, someone threatens a passenger with a gun. |  |
| 4. In the heat of an argument, the opponent unexpectedly points a gun at me. |  |
| 5. You see a child pointing a gun at a friend and you are unsure if the gun is just a toy. |  |
| 6. I have to pick up a gun as part of my safety training. |  |

Please indicate the extent to which you agree with the following statements **(1 - strongly agree,**

**7 - strongly disagree):**

|  | **1-7** |
| --- | --- |
| 7. I would be willing to use a legally owned firearm if someone threatened a close  family member. |  |
| 8. I would not mind participating in firearms training under the direction of  an experienced instructor. |  |
| 9. I would feel uncomfortable walking past a facility guarded by a group of soldiers  with guns. |  |
| 10. I would not mind if my neighbor owned a firearm. |  |
| 11. I would not use a firearm even if burglars broke into my house/apartment. |  |
| 12. I don't mind that it is possible/relatively easy to legally obtain a firearm  in my country. |  |

**ATG Cz (Attitude toward guns - Czech version)**

This version of the questionnaire assessing human attitudes towards guns and their use is modified for the Central European environment. Unlike the questionnaires developed for the American surveys, it reflects more closely the current situation regarding firearms. The questionnaire was developed for research purposes in the Czech Republic, its use is also appropriate for other Central European countries where the situation regarding guns is similar. The first part (questions 1-6) measures the level of fear that people may feel in different situations related to keeping and using guns (the “anxiety” subscale). The second part (questions 7-12) measures individuals' attitudes towards guns and their willingness to use them (the “avoid” subscale).

Each part of the questionnaire is scored separately as a distinct subscale. The first part, the ‘anxiety’ subscale, is the sum of the results of all questions rated on a scale of 1-7 (1= barely afraid at all, 7= very much afraid). The higher the final score, the more fear of guns the respondent feels. The second part, the “avoid” subscale, contains questions that have a reversed meaning; the scores of these questions have to be reversed when evaluating them, namely questions 9 and 11. The questions are again rated on a scale of 1-7 (1 = strongly agree, 7 = strongly disagree). The higher the final score, the more respondents are uncomfortable with the use of guns and the more they try to avoid the use of guns.

The final score (for the “avoid” subscale) is obtained by the following sum: final score = question 7 + question 8 + (8 - question 9) + question 10 + (8 - question 11) + question 12.
